# Supplementary material for: Highly Sensitive Detection of Zika Virus Nonstructural Protein 1 in Serum Samples by a Two-Site Nanobody ELISA
Source: MDPI journal article supplement (doi:10.3390/biom10121652), 2020-12-09
Supplement: s1 [file s1]

## Supplementary Material

### **Highly sensitive detection of Zika virus non-structural protein 1 in serum samples by a two-site nanobody ELISA**

Triana Delfin-Riela<sup>1</sup>, Martín Rossotti<sup>1</sup>, Romina Alvez-Rosado<sup>1</sup>, Carmen Leizagoyen<sup>2</sup> and Gualberto González-Sapienza<sup>1,\*</sup>

<sup>1</sup>Cátedra de Inmunología, DEPBIO, Facultad de Química, Instituto de Higiene, UDELAR, Montevideo, Uruguay. <sup>2</sup>Parque Lecoq, IMM, Montevideo Uruguay.

\*Corresponding author. Av. A. Navarro 3051, 2nd floor. 11600 Montevideo, Uruguay, ggonzal@fq.edu.uy, (598) 24874334.

Keywords: Nanobody, Zika, NS1, Immunoassay/ELISA, Phage Display,

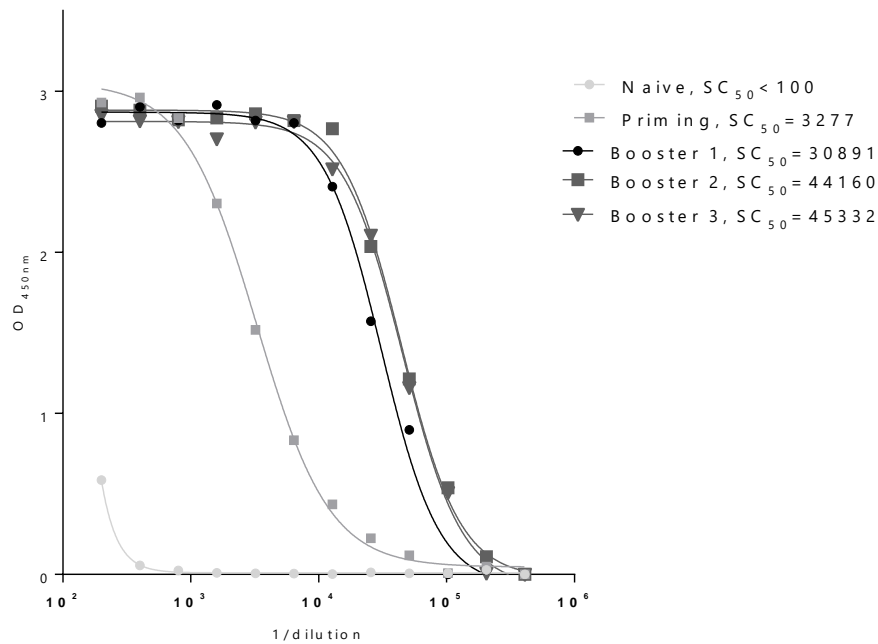

**Figure S1. Serum titration against ZVNS1 along the immunization process.** Serum samples were analyzed by ELISA on plates coated with ZVNS1. The titer, calculated as the concentration causing a 50% decrease in the maximum signal ( $SC_{50}$ ) is shown in the insert and was used as an indicator of the progression of the llama immunity response.

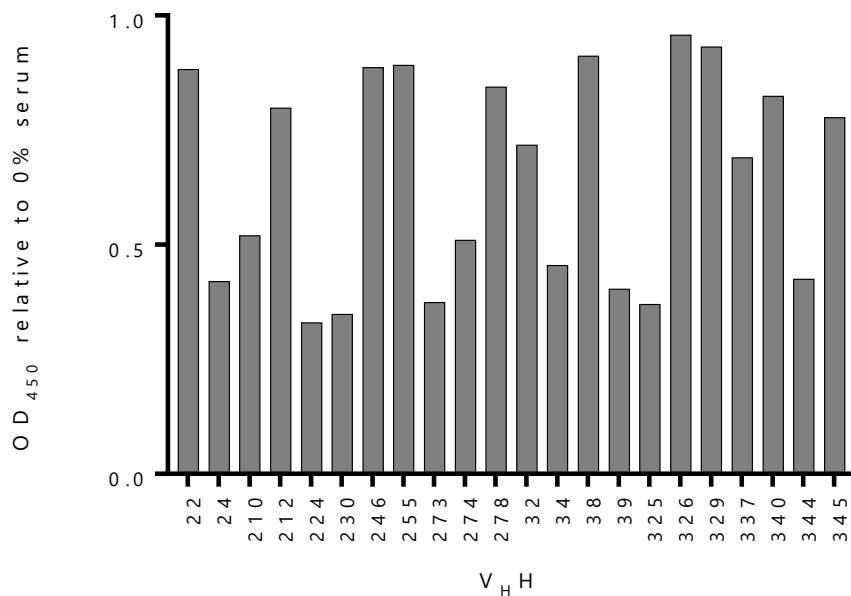

**Figure S2- Performance of 22 Nb clones in the presence of human serum.** The culture supernatant of each clone was assayed on wells coated with 100 ng/well of ZVNS1 in the presence or absence of 50% human serum. Bars represent the average of two measurements.

|        | -----FR1-----             | CDR1                       | -----FR2-----      | CDR2                                      | -----FR3-----                              | CDR3              | -----FR4-----   |
|--------|---------------------------|----------------------------|--------------------|-------------------------------------------|--------------------------------------------|-------------------|-----------------|
| 1 22   | EVQLVDSGGGLVQTGGSLRLSCAAS | GTIFSTKA                   | MGWYRQAPGKRRREFVAL | IAPGGDI----                               | TYADSAEGRFTISRDSAKGTV--WLQMNLDKAEIDTAVYYC  | NTVPRQD-----      | WGQGTQVTVSS     |
| 51 278 | QVQLVDSGGGLVQPGGSLRLSCAAS | GNIFSTKA                   | MGWYRQAPGKRRREFVAL | IDPAGST----                               | TYADSVGEGRFTISRDSAKGTV--WLQMNLDKAEIDTAVYYC | NTVPRQD-----      | WGQGTQVTVSS     |
| 50 274 | EVQLVDSGGGLVQTGGSLRLSCAAF | GSIFSRA                    | VGWYRQAPGKQREFVAL  | IAPAGDT----                               | TYADSVGEGRFTISRDSATNTV--WLQMNLEPEDTAAYYC   | NTIPRVKD-----     | WGQGTQVTVSS     |
| 17 337 | EVQLVDSGGGLVQTGGSLRLSCVTS | GVIFSRA                    | VGWYRQAPGKRRREFVAL | IDPAGTT----                               | TYADAVEGRFTISRDSAKNTV--WLQMNLDKAEIDTSVYYC  | NTVPRKD-----      | WGQGTQVTVSS (2) |
| 68 326 | QVQLVDSGGGLVQAGGSLTLCSDS  | GSIFRHS                    | MGWYRQVPGKQREFVAL  | ITKGGT-----                               | TYEDTVKGRFTISMSARNSTV--YLQMNLSLKPADTAVYYC  | NAKWGYNNSDY-----  | WGQGTQVTVSS     |
| 55 34  | QVQLVDSGGGLVQAGGSLTLCSDS  | GSILRFNS                   | MGWYRQAPGKQREFVAL  | ITKGGSA-----                              | TYSDVMGRFTITMNSARNSTV--WMQMNLSLKPADTAIYYC  | NAKWGYNNSDY-----  | WGQGTQVTVSS     |
| 58 39  | EVQLVDSGGGLVQAGGSLRLSCGRS | GSFSLNS                    | MGWYRQAPGKRRFIAS   | ITIGGGTT----                              | RYADSVKGRFTISRDNKNTV--YLQMNLSLKPEDTAVYYC   | NADAIVNNRRMQY---- | WGQGTQVTVSS     |
| 3 210  | QVQLVDSGGGLVQAGGSLRLSCAAS | GRFFSRYA                   | LGWYRQAPGKQREFVAL  | ITNGDIT-----                              | DYANSVKGRFTISRDNKNTG--YLQMNLSLKPEDTAVYYC   | NLGFGGTGGSSNF---- | WGQGTQVTVSS (2) |
| 43 255 | QVQLVDSGGGLVQPGGSLRLSCAVS | GTFSSITA                   | MGWYRQAPGQREFVAL   | FTSGGRT-----                              | NYVDSVKGRFTISRDNARNTVDLYLQMNLSLKPEDTAVYYC  | NVEGLWNNRRERA---- | WGQGTQVTVSS     |
| 72 340 | QVQLVDSGGGLVQPGGSLRLSCAVS | GTFSSITS                   | MGWYRQAPGKQREFVAL  | FTSGGRT-----                              | YVDSVKGRFTISRDNARNTVDLYLQMNLSLKPEDTAVYYC   | NVEGLWNNRRERA---- | WGQGTQVTVSS     |
| 67 325 | EVQLVDSGGGLVQAGGSLRLSCAAS | GSIFSRGNAMASRQAPGKQREFVAL  | ITSDDGA-----       | YVDSVKGRFTISRDNKNTV--FLQMNLSLKPEDTAVYYC   | NTLPRWA-----                               | WGQGTQVTVSS       |                 |
| 4 212  | QVQLVDSGGGLVQAGGSLRLSCAAS | GNIFSSNAVGVRRAPGKQREFVAL   | ITSGDST-----       | HYADSVGEGRFTISGNAKNTV--YLQMDLSLKPEDTAVYYC | TTVPRGD-----                               | WGQGTQVTVSS       |                 |
| 64 32  | EVQLVDSGGGLVQAGGSLRLSCAVS | GIDFSRYAITWNRQSPGNRRREFVAL | LPPADTT-----       | VYADSVKGRFTISRDNKNTV--YLQMNLSLKPEDTAVYYC  | ATSPRIHN-----                              | WGQGTQVTVSS       |                 |
| 26 230 | QVQLVDSGGGLVQAGGSLRLSCAAT | RRVYDTKV                   | MGWYRQAPGKQREFVAL  | FLIINGRVQRP                               | NYAAPVNGRFTISRDSAKDTV--DLQMNLSLKPEDTAVYYC  | SMKLGYPVSEEY----  | WGQGTQVTVSS     |
| 34 246 | EVQLVDSGGGLVQAGGSLRLSCAGS | ARLSSSIKA                  | MGWYRQAPGKQREFVAL  | VTGGST-----                               | IYADSVGEGRFTISRDNKNTV--YLQMNLSLKPEDTAVYYC  | NEMPRIMP-----     | WGQGTQVTVSS (3) |
| 32 344 | QVQLVDSGGGLVQPGGSLRLSCAAS | EFTFNITYF                  | MYWARQAPGKGLEWVST  | ITPGGERT---                               | VYADSVKGRFTISRDNKNTL--YLQMNLSLKPEDTAVYYC   | ARGLAAGIANSAAARY  | RQGGTQVTVSS     |
| 49 273 | QVQLVDSGGGLVQPGGSLRLSCAAS | GTFPSDAA                   | MTWARQAPGKGLEWVST  | IRSDGS-T---                               | IYAESVKGRFTISRDNKNTL--YLQMNLSLKPEDTAVYYC   | RRPMPGPDGRDY----  | RQGGTQVTVSS     |
| 6 224  | QVQLVDSGGGLVQPGGSLRLSCAAS | GTFFAHYA                   | MTWARQAPGKGLEWVST  | INSDGSDT---                               | AYADSVKGRFTISRDNKNTL--YLQMNLSLKPEDTAVYYC   | SIGRPDWTR-----    | RQGGTQVTVSS     |
| 2 24   | QVQLVDSGGGLVQPGGSLRLSCAAS | GTFFAHYA                   | MTWARQAPGKGLEWVST  | INSDGSDT---                               | AYADSVKGRFTISRDNKNTL--YLQMNLSLKPEDTAVYYC   | GIGRPDWTR-----    | RQGGTQVTVSS     |
| 57 38  | QVQLVDSGGGLVQPGGSLRLSCAAS | GTFFAHYA                   | MSWYRQAPGKGLEWVST  | INSDGSDT---                               | AYADSVKGRFTISRDNKNTL--YLQMNLSLKPEDTAVYYC   | QIGRPVTR-----     | RQGGTQVTVSS (4) |
| 69 329 | EVQLVDSGGGLVQPGGSLRLSCAAS | GTFPSLYA                   | MNWYRQAPGKGLEWVST  | INSDGSDT---                               | AYADSVKGRFTISRDNKNTL--YLQMNLSLKPEDTAVYYC   | ARGRPSSSQP-----   | RGRGTQVTVSS (5) |
| 33 345 | EVQLVDSGGGLVQPGGSLRLSCAAS | GFAFSGYA                   | MTWARQAPGKGLEWVST  | INSDGSDI---                               | AYADSVKGRFTISRDNKNTL--YLQMNLSLKPEDTAVYYC   | TIGRPTPNWTR-----  | RQGGTQVTVSS (2) |

**Figure S3. Capture Nbs to ZVNS1 sequence alignment.** The regions corresponding to the frameworks (FR) and the three CDRs are denoted on top. Numbers between brackets indicate the number of clones that have that sequence. Gaps are shown as dashes. The top and bottom sequences derived from VHH and VH genes, respectively. The hallmark residues of VHH are shown in bold and the GLEW motif and the Arg residue that substitus for W in FR4 of VH are also in bold. Sequence clone numbers (plain) and sequence names (bold) are shown on the left.

|               | -----FR1-----             | CDR1     | -----FR2-----      | CDR2        | -----FR3-----                             | CDR3           | -----FR4-----   |
|---------------|---------------------------|----------|--------------------|-------------|-------------------------------------------|----------------|-----------------|
| 12 <b>A12</b> | EVQLVDSGGGLVQAGGSLRLSCGAS | GSFSSINS | MGWYRQAPGKRRREFVAL | TTLGGGGA--- | KYADSVKDRFTISRDLAKMTV--FLQMSLSLKPEDTAVYYC | NADGI FNNRRMQY | WGQGTQVTVSS     |
| 31 <b>C7</b>  | QVKLLESGGGLVQAGGSLRLSCGAS | GSFSSINS | MGWYRQAPGKRRREFVAL | TTLGGGTA--- | NYAESVKDRFTISRDLVMTL--FLQMNLSLKPEDTAVYYC  | NADAI FNNRRMQY | WGQGTQVTVSS (2) |
| 20 <b>B8</b>  | QVQLVDSGGGLVQPGGSLRLSCAAS | GRFFSRYA | LGWYRQAPGKQREFVAL  | ITNGDIT---  | DYANSVKGRFTISRDNKNTG--YLQMNLSLKPEDTAVYYC  | NLGFGGTGGSSNF  | WGQGTQVTVSS (2) |
| 67 <b>H3</b>  | EVQLVDSGGGLVQAGGSLRLSCAAS | GAIARVNT | MAWYRQAPGKQREFVAL  | WTSTYSEGV   | EYADSVKGRFTISRDSAKNT--YLQMNLSLKPEDTAVYYC  | NLEQHGQLRGVY-  | WGQGTQVTVSS     |
| 59 <b>E10</b> | QVQLVDSGGGLVQAGGSLRLSCGAS | ASVSSNKG | MQWSRQAPGKQREFVAL  | VTGGST---   | IYADSVGEGRFTISRDNKNTV--DLQMNLSLKPEDTAVYYC | NTMPTTMP-----  | WGQGTQVTVSS     |
| 66 <b>F6</b>  | EVQLVDSGGGLVQPGGSLRLSCAAS | GTFPSLYA | MNWRQAPGKGLEWVST   | INSDGSDT--- | AYADSVKGRFTISRDNKNTL--YLQMNLSLKPEDTAVYYC  | ARGRPSSSQP---  | RGRGTQVTVSS (3) |
| 48 <b>E1</b>  | QVQLVDSGGGLVQPGGSLRLSCAAS | GTFFAHYA | MSWYRQAPGKGLEWVST  | INSDGSDT--- | AYADSVKGRFTISRDNKNTL--YLQMNLSLKPEDTAVYYC  | QIGRPVTR-----  | RQGGTQVTVSS (2) |
| 7 <b>A7</b>   | EVQLVDSGGGLVQPGGSLRLSCAAS | GTFFAHYA | MTWARQAPGKGLEWVST  | INSDGSDT--- | AYADSVKGRFTISRDNKNTL--YLQMNLSLKPEDTAVYYC  | SIGRPDWTR----- | RQGGTQVTVSS     |
| 42 <b>D6</b>  | EVQLVDSGGGLVQPGGSLRLSCAAS | GFAFSGYA | MRWYRQAPGKGLEWVST  | INSDGSDT--- | WYADSVKGRFTISRDNKNTL--YLQMNLSLKPEDTAVYYC  | AIGRTHDT-----  | KGQGTQVTVSS     |
| 45 <b>D9</b>  | EVQLVDSGGGLVQPGGSLRLSCAAS | GFAFSGYA | MRWYRQAPGKGLEWVST  | INSDGSDT--- | WYADSVKGRFTISRDNKNTL--YLQMNLSLKPEDTAVYYC  | AQGRTHDT-----  | KGQGTQVTVSS (2) |

**Figure S4. Detection Nbs to ZVNS1 sequence alignment.** The regions corresponding to the frameworks (FR) and the three CDRs are denoted on top. Numbers between brackets indicate the number of clones that have that sequence. Gaps are shown as dashes. The top and bottom sequences derived from VHH and VH genes, respectively. The hallmark residues of VHH are shown in bold and the GLEW motif and the Arg residue that substitus for W in FR4 of VH are also in bold. Sequence clone numbers (plain) and sequence names (bold) are shown on the left.

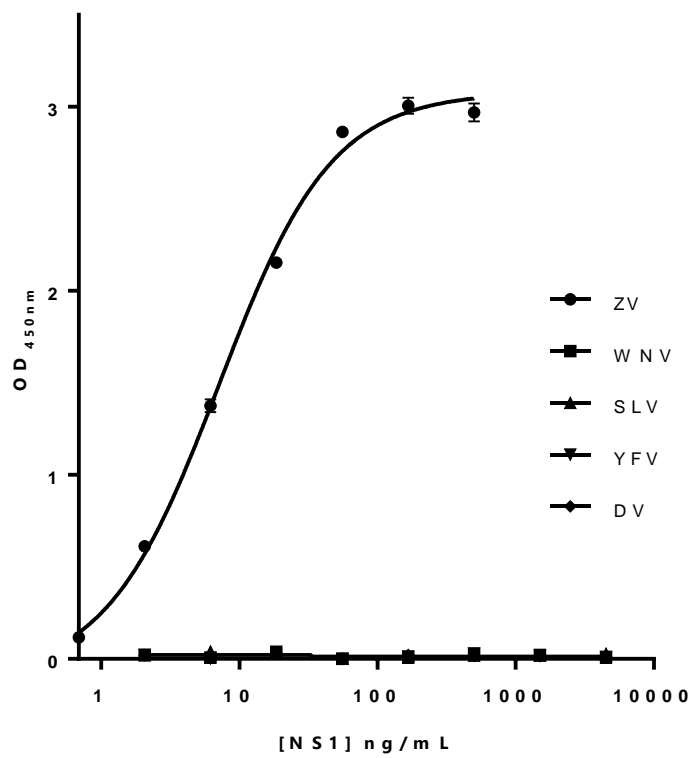

**Figure S5. Analysis of cross-reactivity of the 32/D6 nanobody pair with non-Zika NS1.** Each NS1 was individually tested in the 0.3-4500 ng/mL range. The results are the average values of triplicate measurements and the error bars represent the standard deviation.
